# Supplementary material for: Signal Enhancement in Oriented Immunosorbent Assays: A Balance between Accessibility of Antigen Binding Sites and Avidity
Source: MDPI journal article supplement (doi:10.3390/bios11120493), 2021-12-03
Supplement: s1 [file s1]

Communication

# Signal Enhancement in Oriented Immunosorbent Assays: A Balance between Accessibility of Antigen Binding Sites and Avidity

Vanessa Susini <sup>1</sup>, Vanna Fierabracci <sup>1</sup>, Gaia Barria <sup>1</sup>, Lisa Dodoli <sup>1</sup>, Laura Caponi <sup>1,2</sup>, Aldo Paolicchi <sup>1,2</sup> and Maria Franzini <sup>1,2\*</sup>

<sup>1</sup> Department of Translational Research and of New Surgical and Medical Technologies, University of Pisa, Via Savi 10, 56126 Pisa, Italy; vanessa.susini@med.unipi.it (V.S.); vanna.fierabracci@unipi.it (V.F.); gaiabarria.93@gmail.com (G.B.); lisadodoli18@gmail.com (L.D.); laura.caponi@unipi.it (L.C.); aldo.paolicchi@unipi.it (A.P.)

<sup>2</sup> Laboratory of Clinical Pathology, Santa Chiara University Hospital, Via Roma 67, 56126 Pisa, Italy; laura.caponi@unipi.it (L.C.); aldo.paolicchi@unipi.it (A.P.)

\* Correspondence: maria.franzini@unipi.it

**Table S1.** ELISA for the detection of cTnI using non-oriented whole-IgG or oriented rIgG. Data are represented as mean  $\pm$  SD ( $n = 4$ ). cTnI, cardiac troponin I.

| cTnI<br>(ng/ml) | Oriented antibodies<br>(fluorescence a.u.) | Non-oriented antibodies<br>(fluorescence a.u.) |
|-----------------|--------------------------------------------|------------------------------------------------|
| 0.41            | 102.30 $\pm$ 9.21                          | 9.45 $\pm$ 7.84                                |
| 0.82            | 185.42 $\pm$ 7.51                          | 102.01 $\pm$ 44.18                             |
| 1.64            | 321.72 $\pm$ 21.8                          | 131.13 $\pm$ 14.57                             |
| 3.27            | 457.96 $\pm$ 28.4                          | 248.21 $\pm$ 45.67                             |

**Table S2.** ELISA for the detection of PSA-ACT using non-oriented whole-IgG or oriented rIgG. Data are represented as mean  $\pm$  SD ( $n = 4$ ). PSA-ACT, prostate-specific antigen-alpha(1)antichymotrypsin

| PSA-ACT<br>(ng/ml) | Oriented antibodies<br>(fluorescence a.u.) | Non-oriented antibodies<br>(fluorescence a.u.) |
|--------------------|--------------------------------------------|------------------------------------------------|
| 1.03               | 116.01 $\pm$ 29.21                         | 42.61 $\pm$ 1.19                               |
| 5.14               | 223.15 $\pm$ 23.56                         | 206.35 $\pm$ 3.39                              |
| 10.28              | 271.93 $\pm$ 17.91                         | 280.44 $\pm$ 3.71                              |
| 25.70              | 374.76 $\pm$ 7.78                          | 374.11 $\pm$ 14.50                             |

**Table S3.** ELISA for the detection of AFP using non-oriented whole-IgG or oriented rIgG. Data are represented as mean  $\pm$  SD ( $n = 4$ ). AFP, alpha-fetoprotein.

| AFP<br>(ng/ml) | Oriented antibodies<br>(fluorescence a.u.) | Non-oriented antibodies<br>(fluorescence a.u.) |
|----------------|--------------------------------------------|------------------------------------------------|
| 3.57           | 68.07 $\pm$ 7.24                           | 102.16 $\pm$ 21.41                             |
| 7.13           | 154.84 $\pm$ 5.60                          | 246.58 $\pm$ 18.74                             |
| 35.66          | 472.10 $\pm$ 52.44                         | 870.03 $\pm$ 38.46                             |
| 356.55         | 652.02 $\pm$ 8.25                          | 1257.82 $\pm$ 78.43                            |

**Table S4.** ELISA for the detection of ferritin using non-oriented whole-IgG or oriented rIgG. Data are represented as mean  $\pm$  SD ( $n = 4$ ).

| Ferritin<br>(ng/ml) | Oriented antibodies<br>(fluorescence a.u.) | Non-oriented antibodies<br>(fluorescence a.u.) |
|---------------------|--------------------------------------------|------------------------------------------------|
| 3.26                | 20.55 $\pm$ 3.65                           | 16.37 $\pm$ 2.83                               |
| 16.32               | 62.20 $\pm$ 6.96                           | 67.32 $\pm$ 3.94                               |
| 40.80               | 71.13 $\pm$ 2.39                           | 101.88 $\pm$ 14.48                             |
| 81.60               | 95.65 $\pm$ 11.91                          | 131.88 $\pm$ 33.08                             |
| 163.2               | 110.87 $\pm$ 18.07                         | 152.78 $\pm$ 22.63                             |

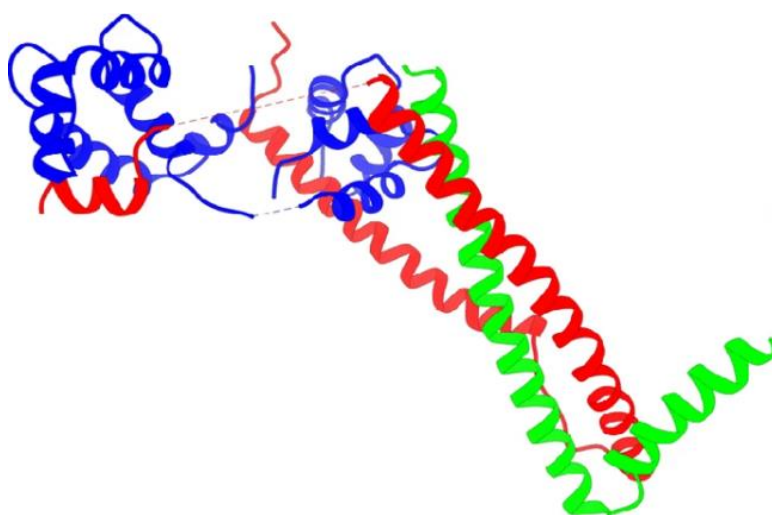

**Figure S1.** Core domain of human cardiac troponin. Cardiac troponin I (red) is a rod-shaped protein of 23.9 kDa and Stokes radius of 3 nm. In blue troponin C and in green troponin T. PDB accession code 1J1D [23].

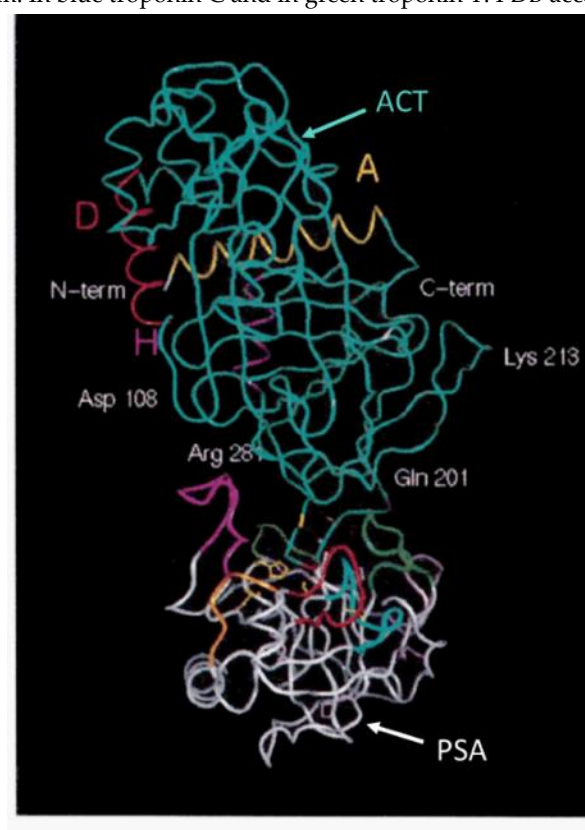

**Figure S2.** Prostate-specific antigen (PSA) in white complexed with alpha(1)-antichymotrypsin (ACT) in blue [15].

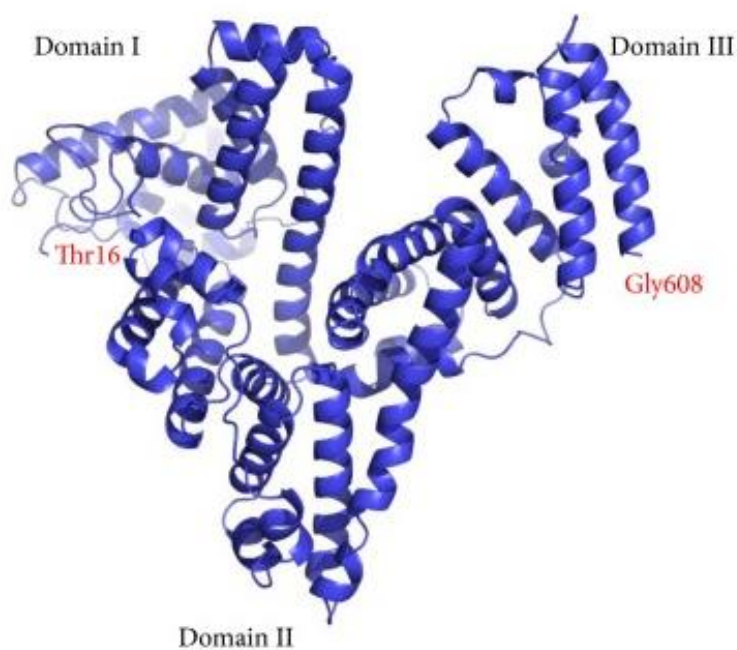

**Figure S3.** Alpha-fetoprotein (AFP) monomer structure model. AFP is a V-shaped protein of about 70 kDa with Stokes radius of 3.26 nm [24].

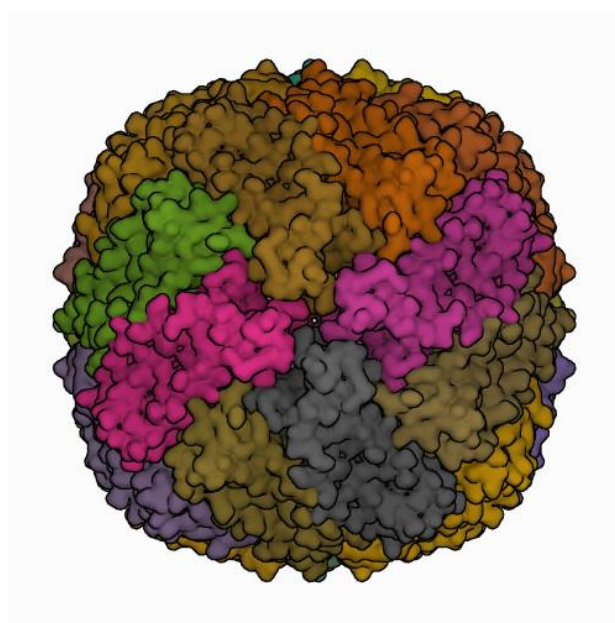

**Figure S4.** Cartoon representation of Ferritin, a globular heterodimeric protein of 474 kDa with hydrodynamic radius of 6 nm. PDB accession code 1FHA [25].
